# Supplementary material for: Association of the endothelial activation and stress index with cognitive function in older adults: a cross-sectional study with machine learning
Source: Research Square preprint supplement (doi:10.21203/rs.3.rs-7537562/v1), 2025-09-30
Supplement: Supplementary file 1 [file 0f095d202a198f5a2ea59203.docx]

**Association of the endothelial activation and stress index with cognitive function in older adults: a cross-sectional study with machine learning**

**Supplementary Figure 1** Flow chart of participants selection.

**Supplementary Figure 2** Association between EASIX and cognitive function scores.

**Supplementary Figure 3** 10-fold Cross-validation for LASSO Regression.

**Supplementary Figure 4** Importance ranking plot of variables for Random Forest model.

**Supplementary Figure 5** Partial Dependence of Cognitive Function on EASIX.

**Supplementary Figure 6** Cognitive function distribution among different EASIX groups.


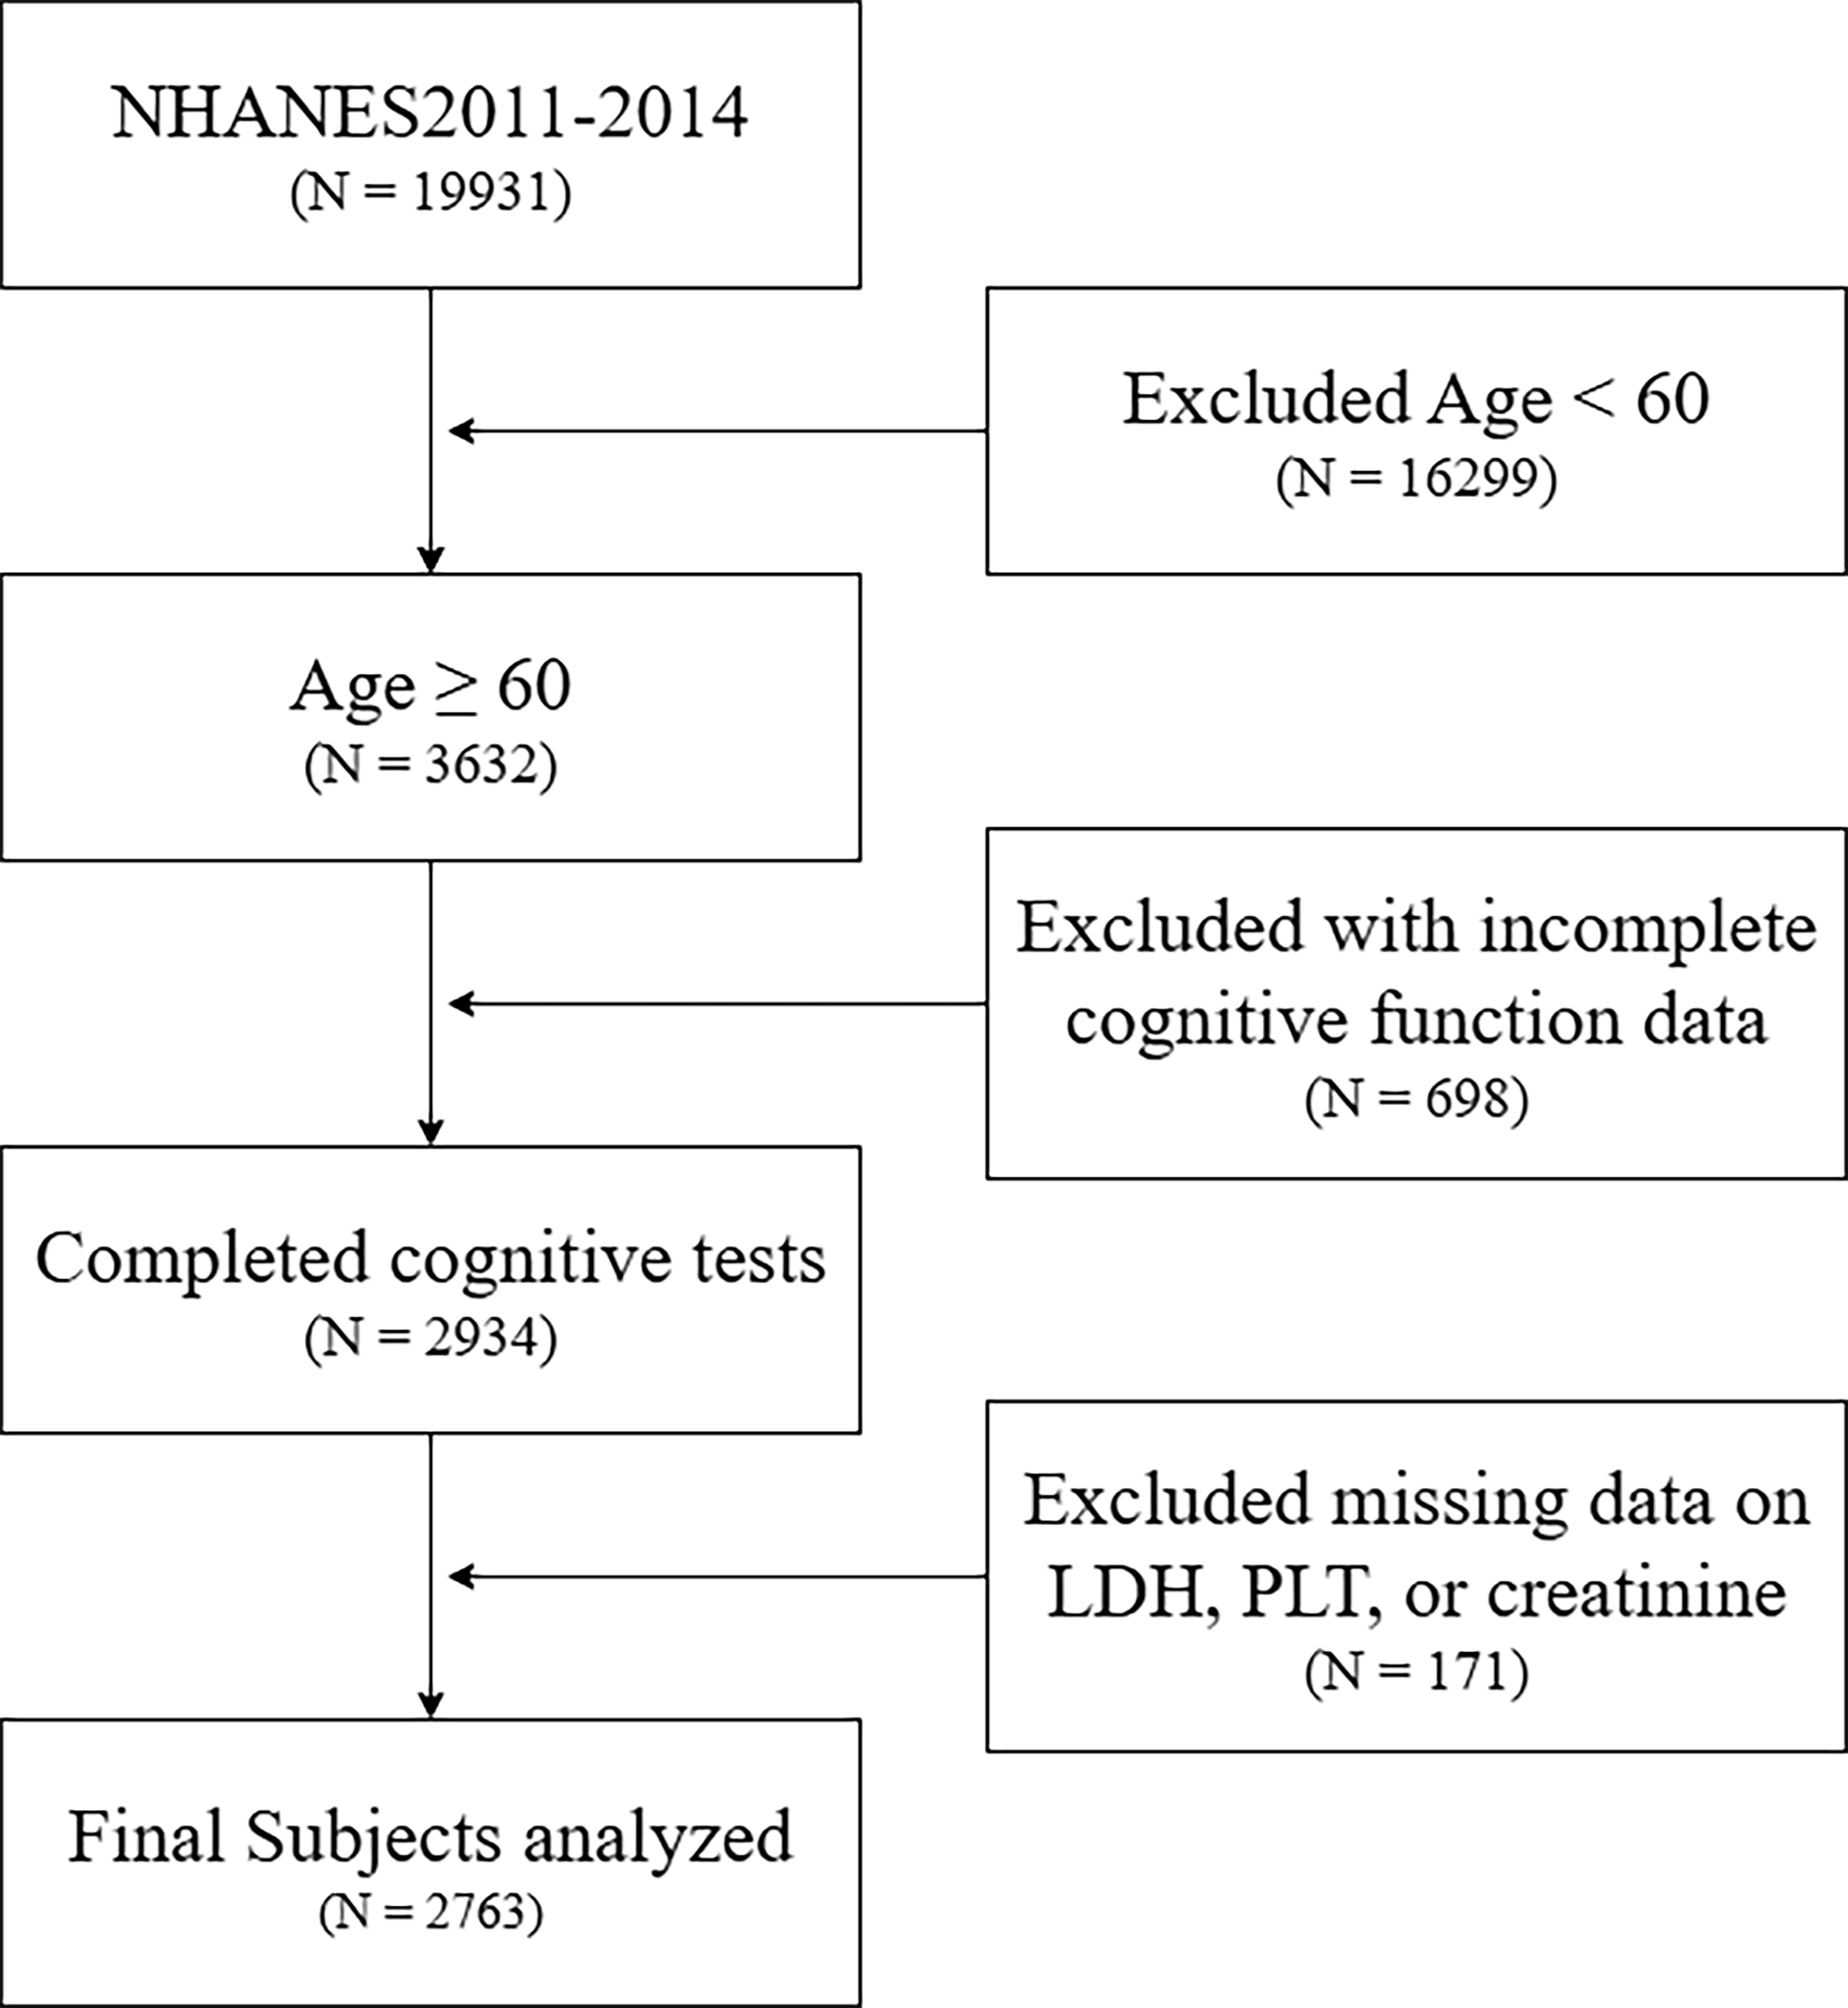


**Supplementary Figure 1** Flow chart of participants selection.

**Abbreviations:** PLT, platelets; LDH, lactate dehydrogenase;


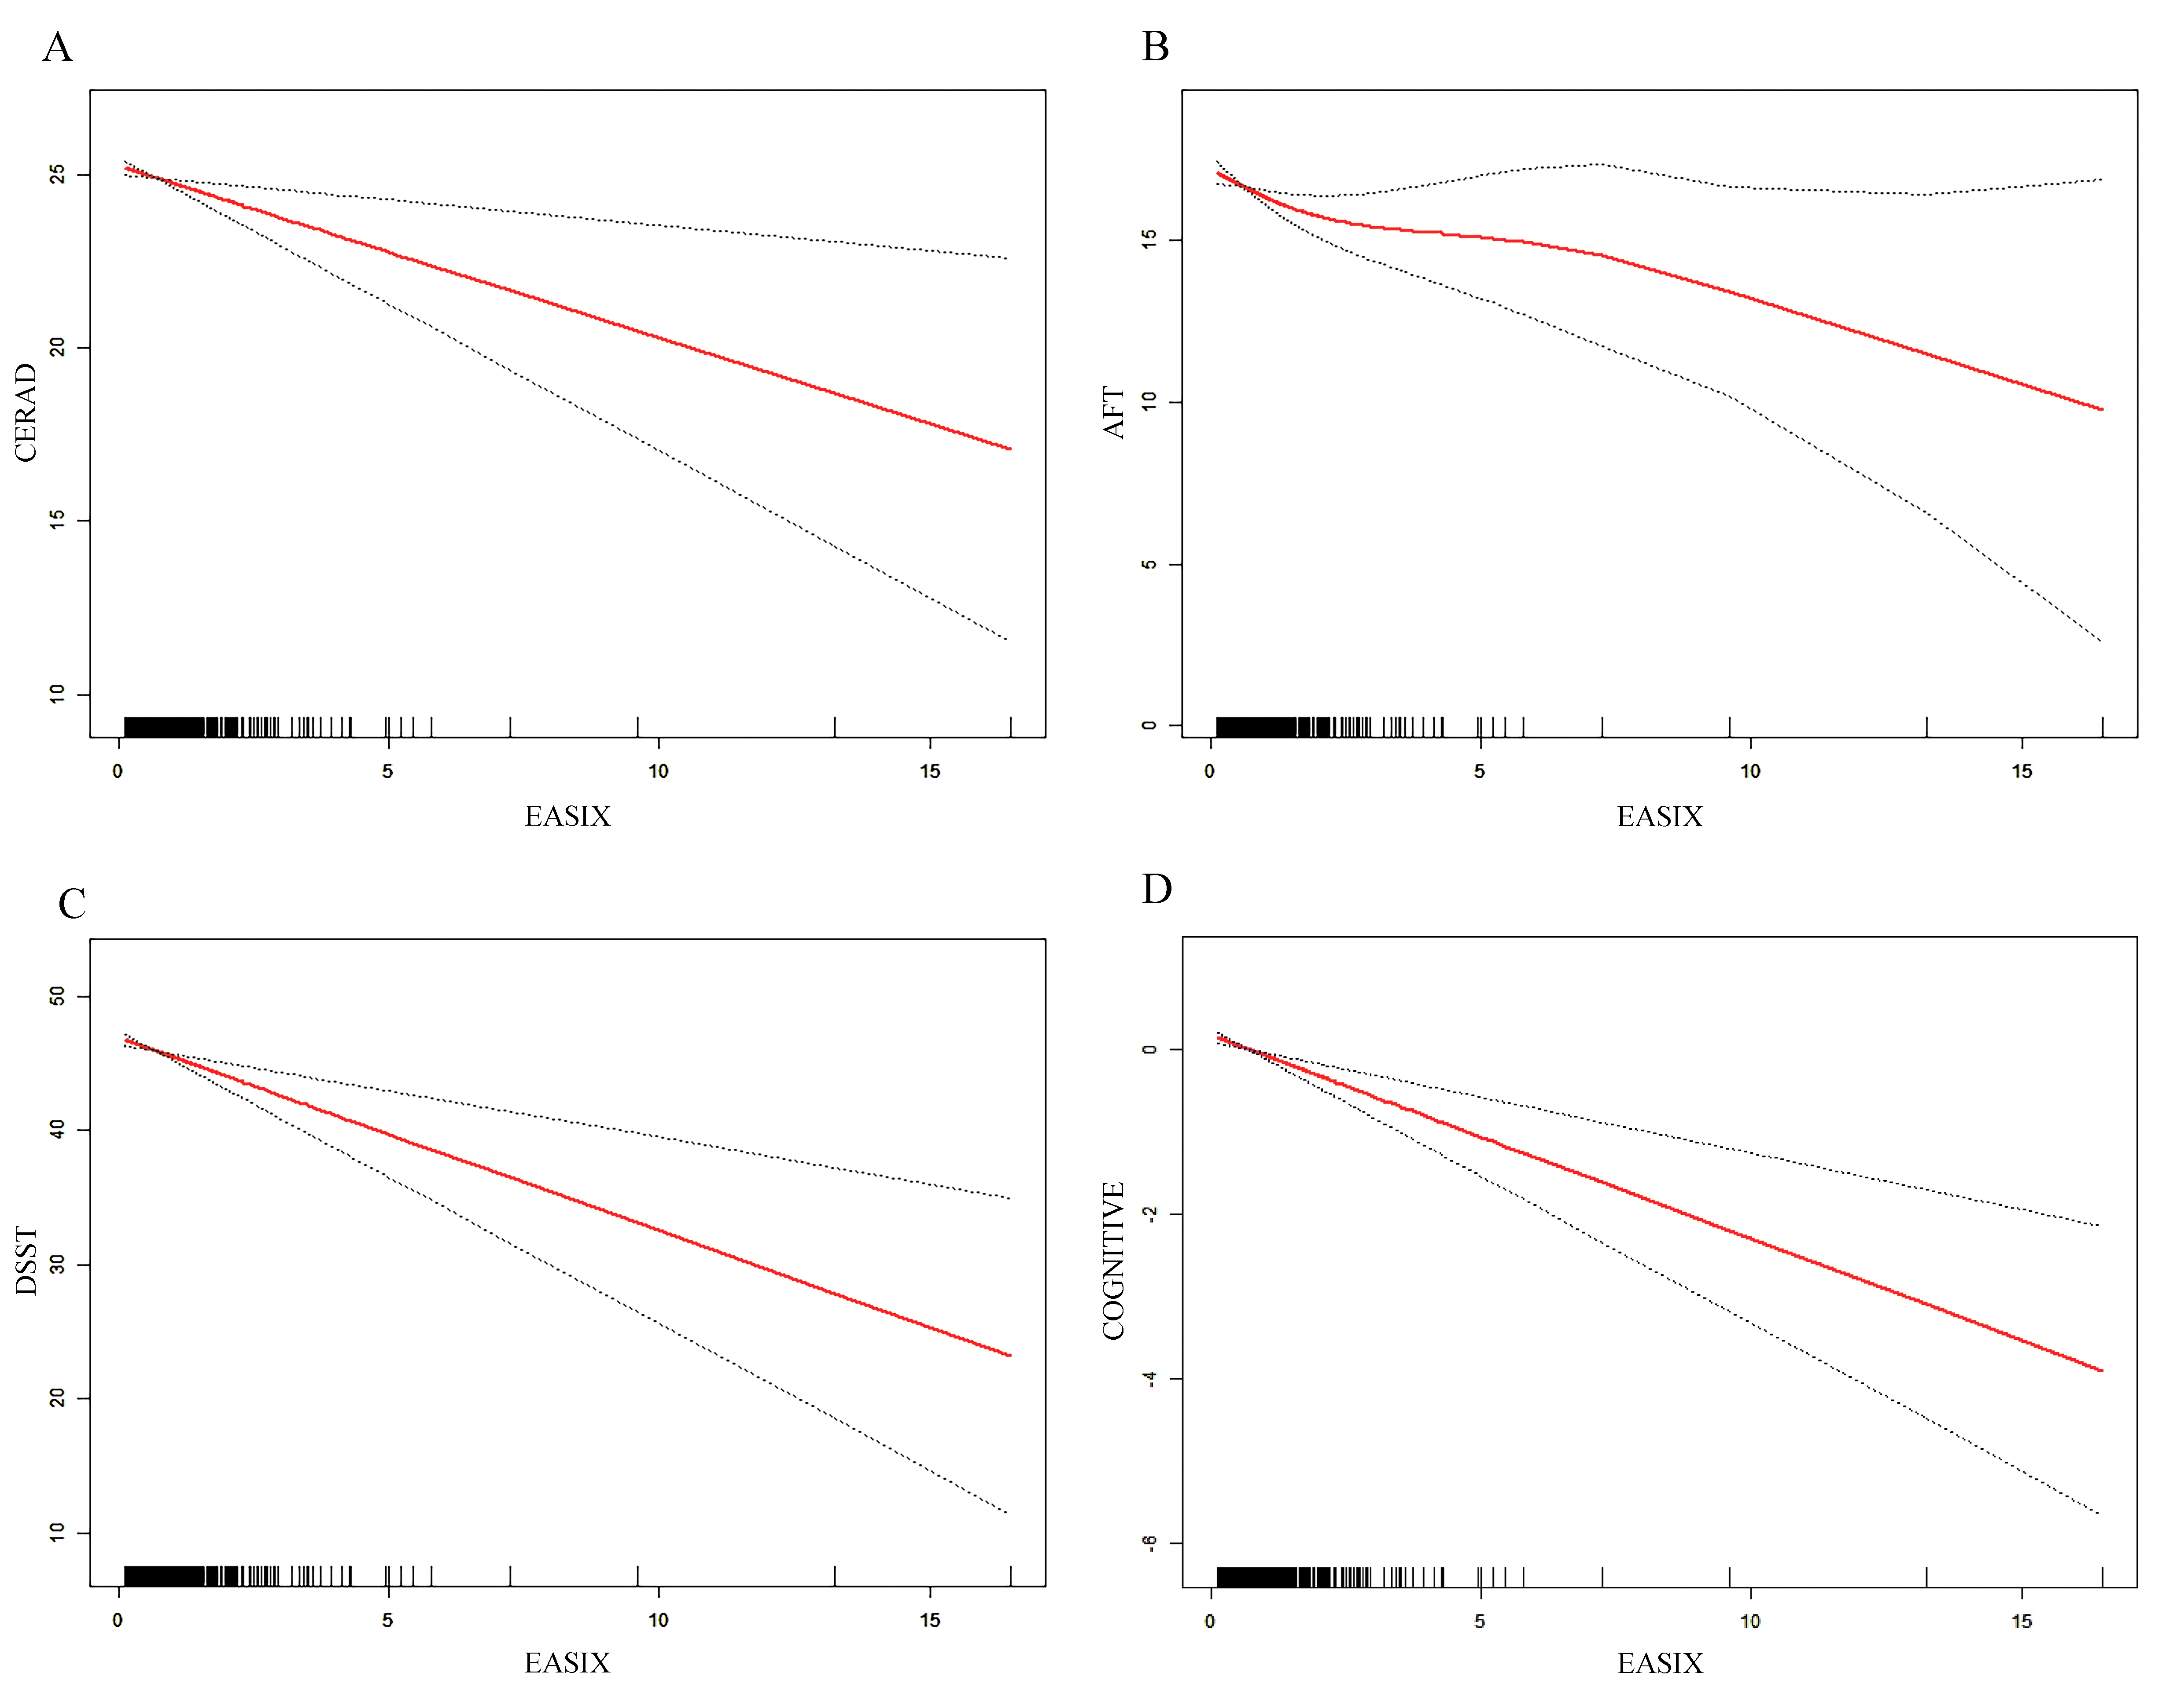


**Supplementary Figure 2** Association between EASIX and cognitive function scores.

**Abbreviations:** CERAD, The Consortium to Establish a Registry for Alzheimer’s Disease; DSST, Digit Symbol Substitution Test; AFT, Animal Fluency test; The CERAD test score included CERAD-WL and CERAD-DR.


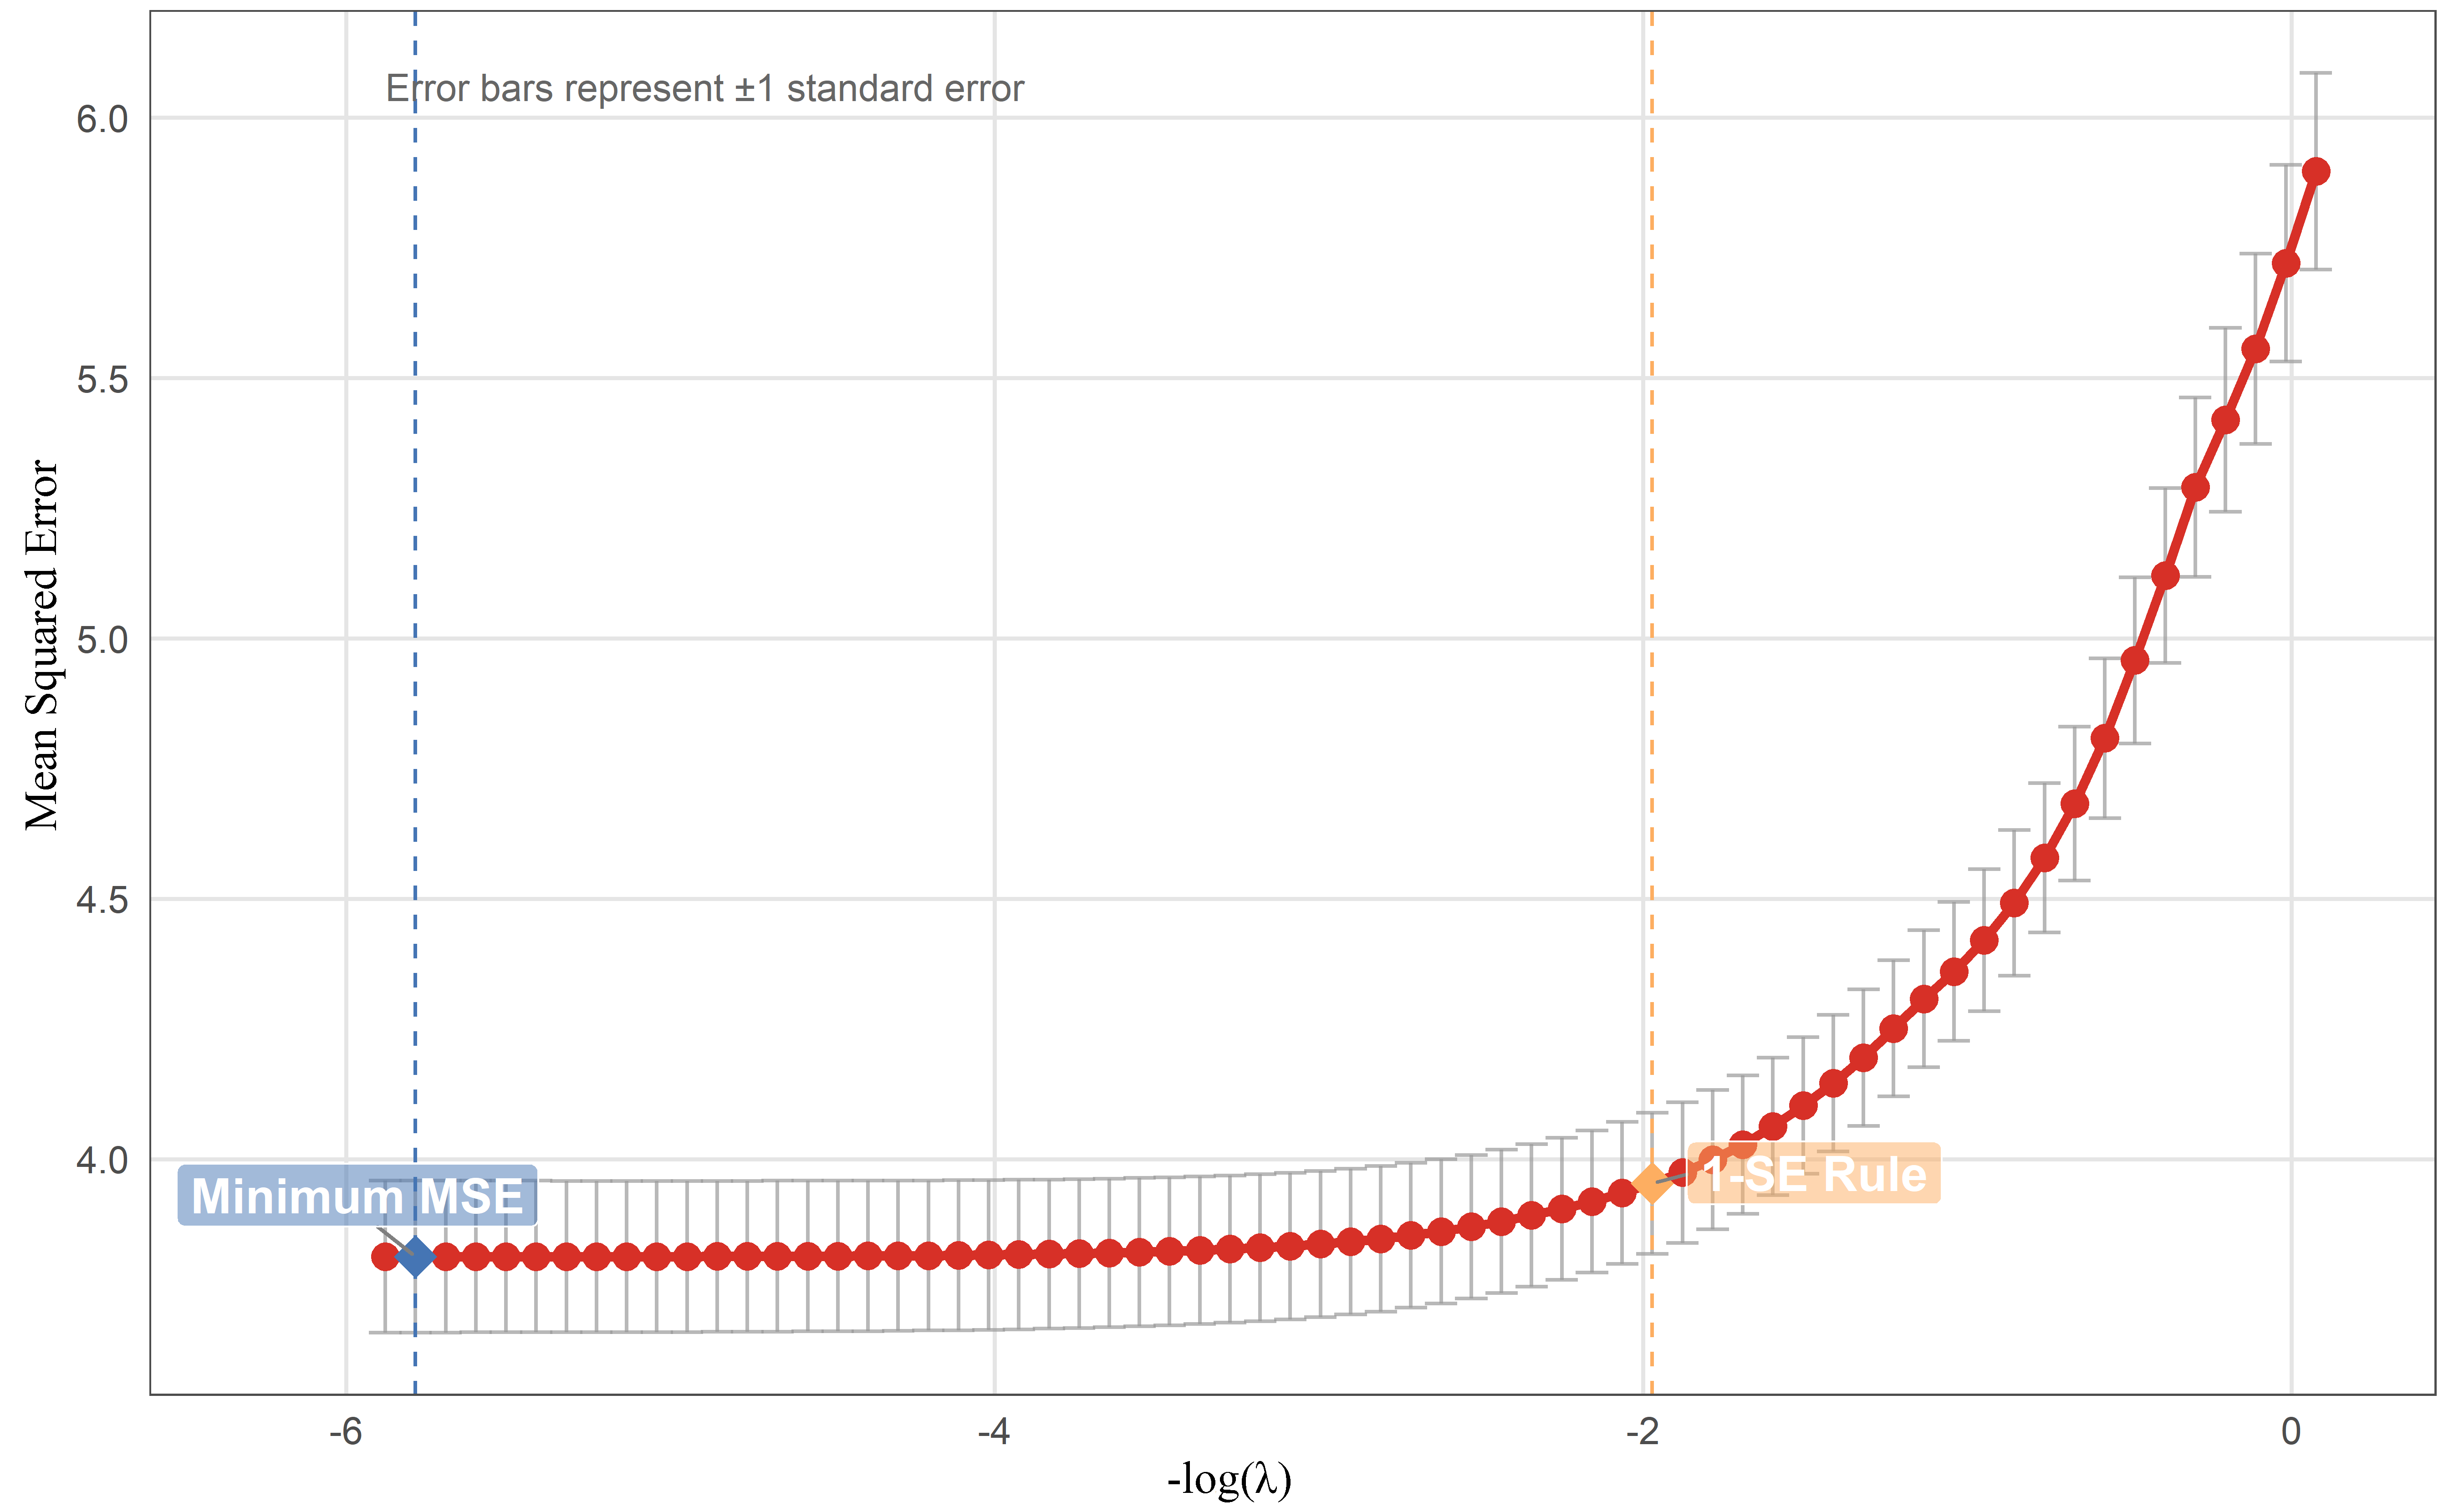


**Supplementary Figure 3** 10-fold Cross-validation for LASSO Regression.


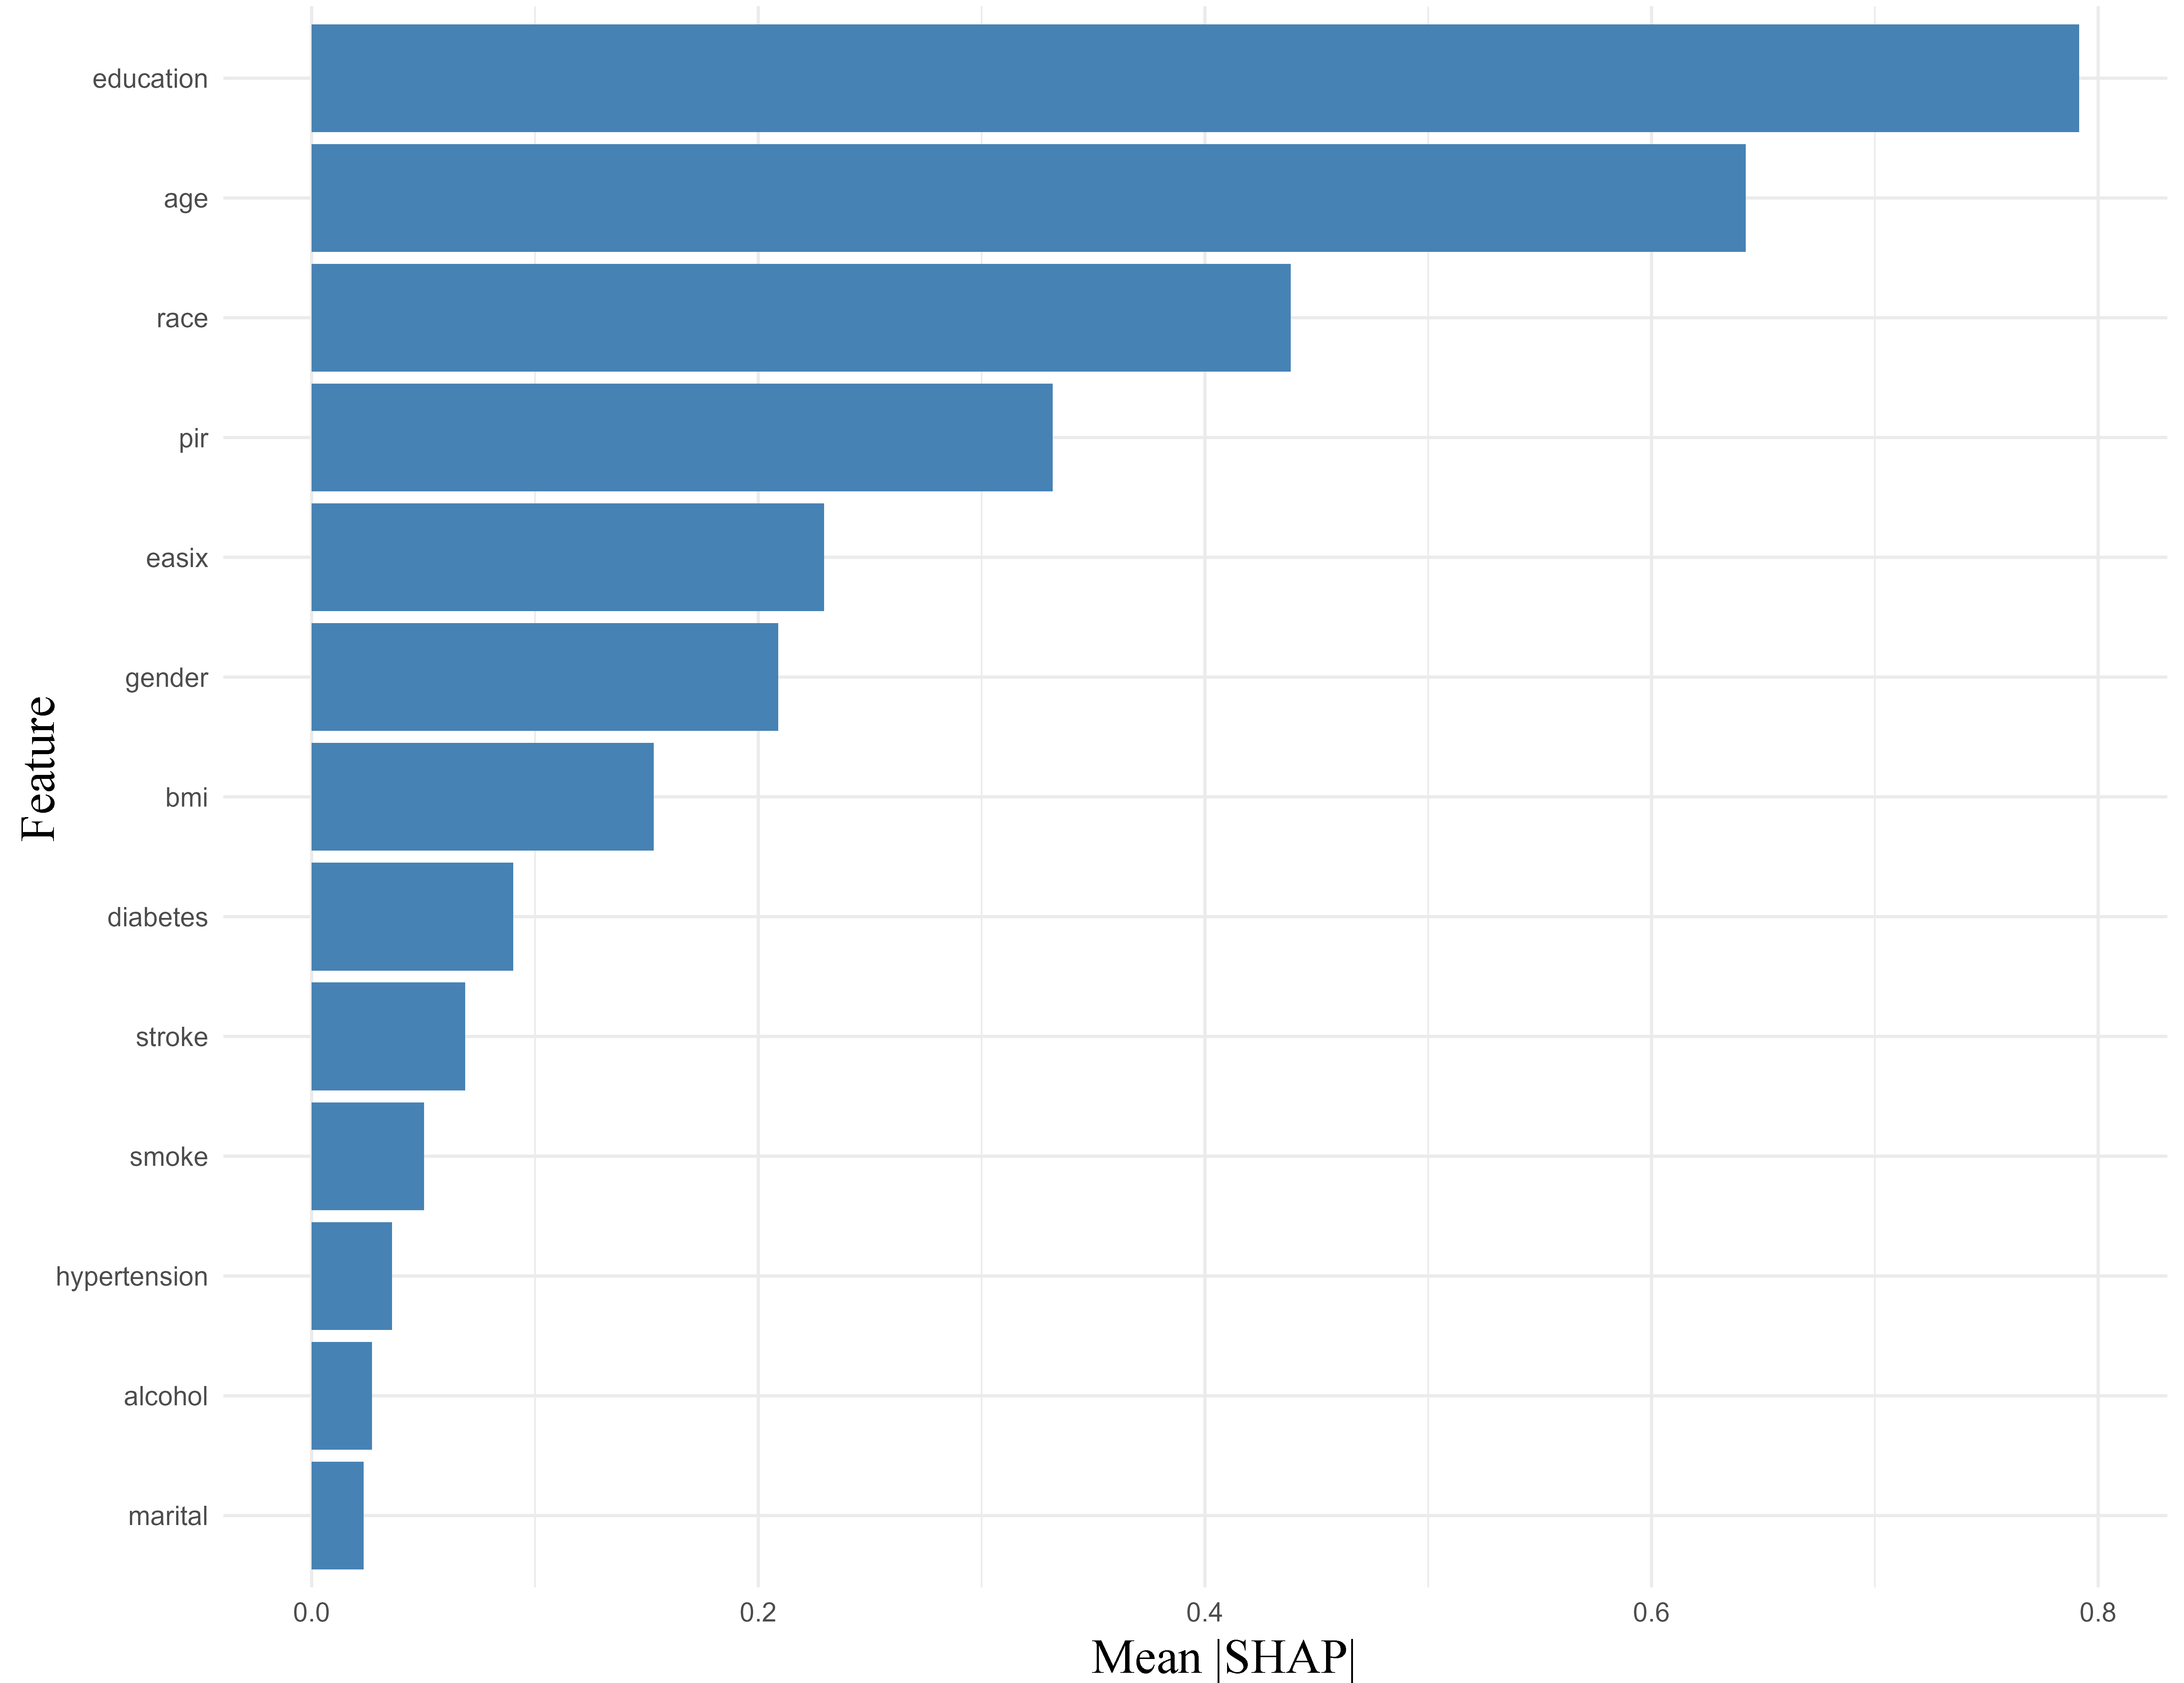


**Supplementary Figure 4** Importance ranking plot of variables for Random Forest model.

**Abbreviations:** BMI, ​body mass index; PIR, the ratio of income to poverty.


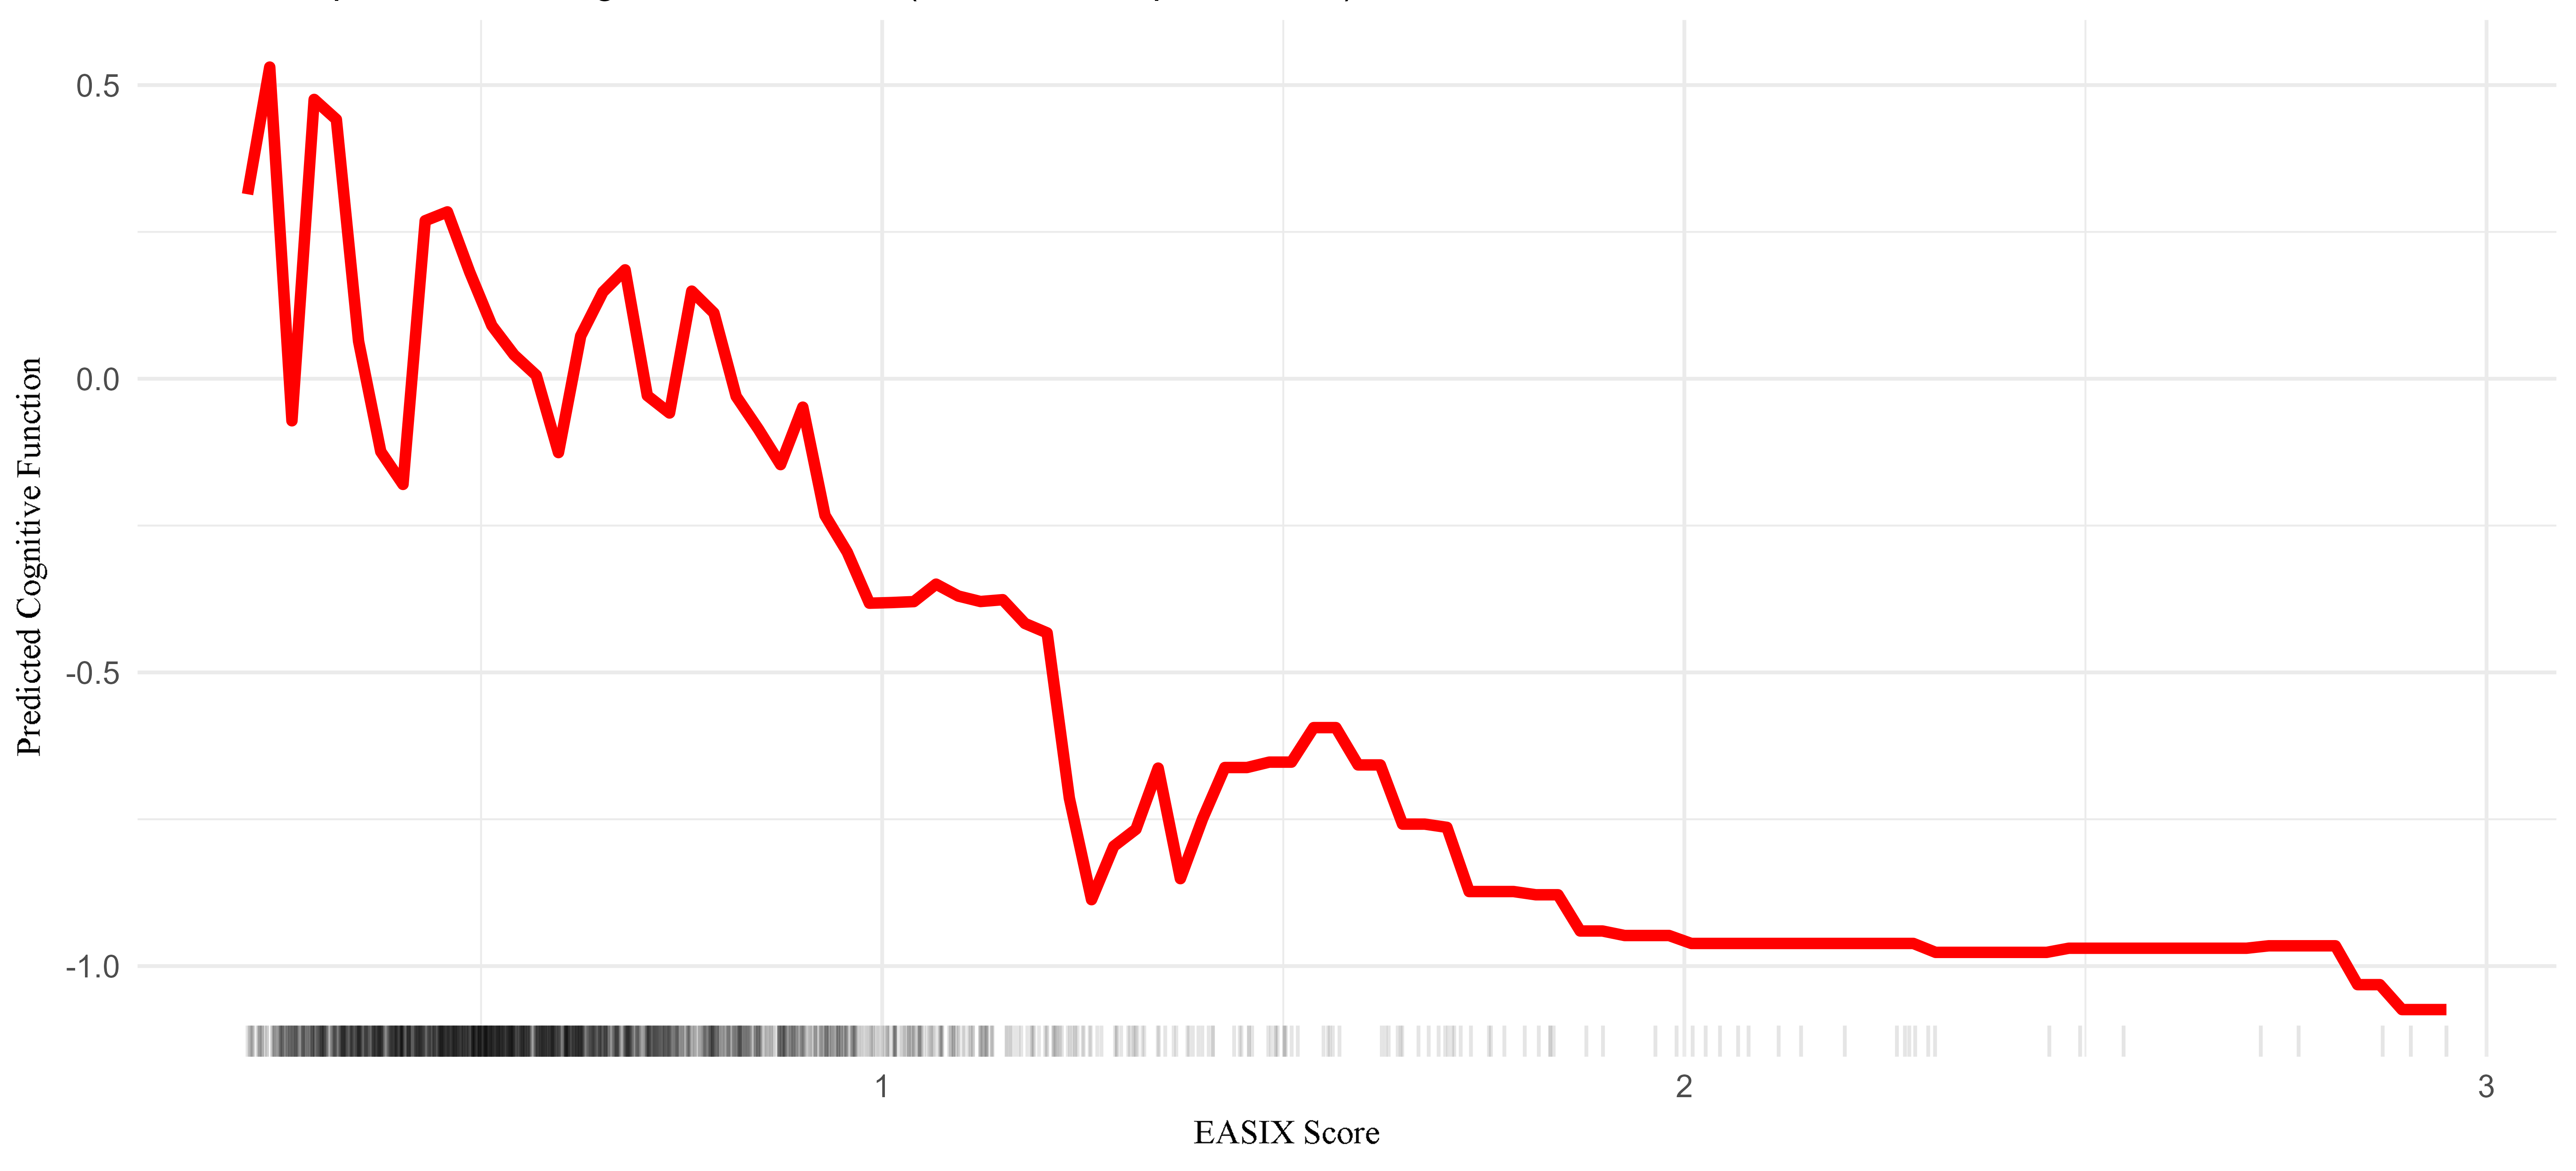


**Supplementary Figure 5** Partial Dependence of Cognitive Function on EASIX.


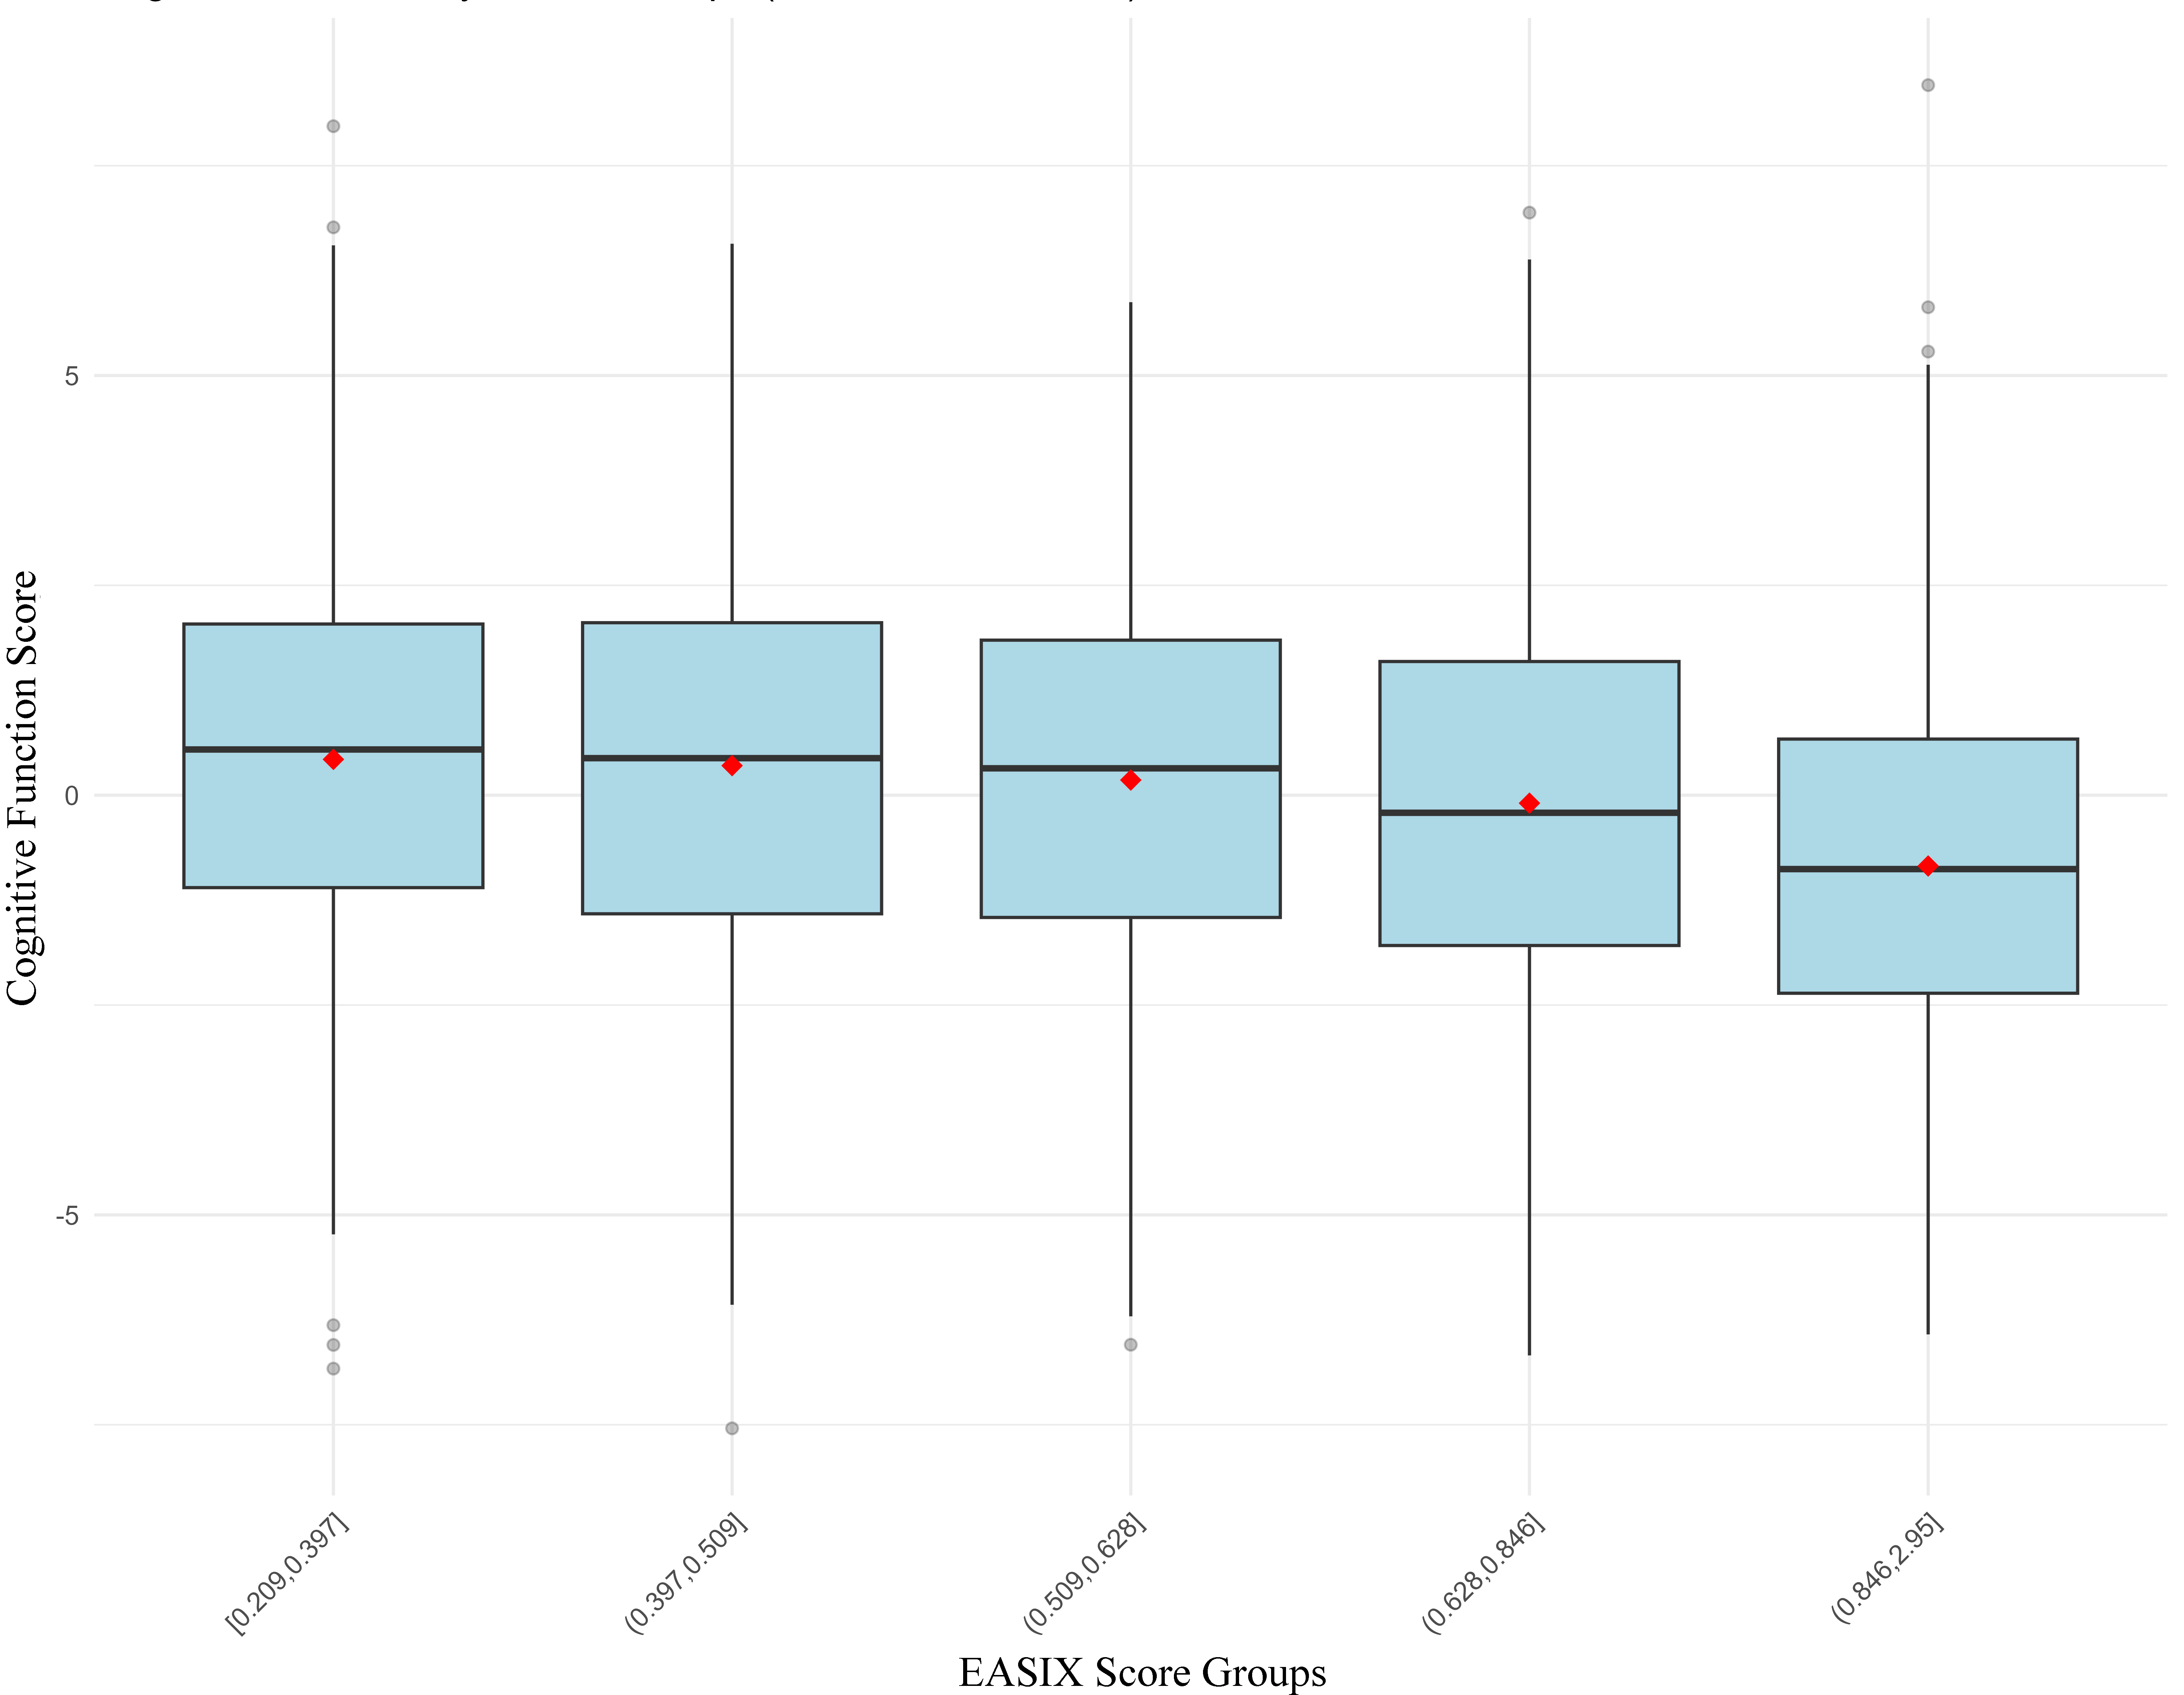


**Supplementary Figure 6** Cognitive function distribution among different EASIX groups.
