# Supplementary material for: Association of the endothelial activation and stress index with cognitive function in older adults: a cross-sectional study with machine learning
Source: Research Square preprint supplement (doi:10.21203/rs.3.rs-7537562/v1), 2025-09-30
Supplement: Supplementary file 2 [file f78c0a7dfb9de4c79b4edb14.docx]

**Association of the endothelial activation and stress index (EASIX) with cognitive function in older adults: a cross-sectional study with machine learning**

**Supplementary Table 1** Threshold effect analysis for correlations between the EASIX and cognitive function scores.

**Supplementary Table2** Subgroup analysis of the association between EASIX and cognitive function scores.

**Supplementary Table3** Comparison of the predictive power of several models.

**Supplementary Table 1** Threshold effect analysis for correlations between the EASIX and cognitive function scores.

|  | Inflection point (k) | Less than k | | More than k | | | *P* for log-likelihood ratio test |
| --- | --- | --- | --- | --- | --- | --- | --- |
| **β (95%CI)** | ***P*-value** | | **β (95%CI)** | ***P*-value** |
| **CERAD-total** | 1.298 | -1.589 (-2.507, -0.671) | <0.001 | | -0.331 (-0.798, 0.136) | 0.165 | 0.028 |
| **AFT** | 0.367 | -7.527 (-12.938, -2.117) | <0.001 | | -0.648 (-0.976, -0.321) | <0.001 | 0.013 |
| **DSST** | 0.501 | 1.983 (-4.058, 8.025) | 0.520 | | -2.339 (-3.169, -1.510) | <0.001 | 0.172 |
| Cognitive score | 1.287 | -0.644 (-0.942, -0.346) | <0.001 | | -0.262 (-0.413, -0.112) | <0.001 | 0.039 |

Adjusted for age, gender, race, education level, marital status, smoke status, alcohol intake, bmi, pir, hypertension, stroke, diabetes.

**Abbreviations:** CERAD, The Consortium to Establish a Registry for Alzheimer’s Disease; DSST, Digit Symbol Substitution Test; AFT, Animal Fluency test; The CERAD test score included CERAD-WL and CERAD-DR.

**Supplementary Table2** Subgroup analysis of the association between EASIX and cognitive function scores.

| **Subgroup** | **CERAD-total**  **β (95%CI)** | ***P*-value** | ***P* for interaction** | **AFT**  **β (95%CI)** | ***P*-value** | ***P* for interaction** | **DSST**  **β (95%CI)** | ***P*-value** | ***P* for interaction** | **Cognitive**  **β (95%CI)** | ***P*-value** | ***P* for interaction** |
| --- | --- | --- | --- | --- | --- | --- | --- | --- | --- | --- | --- | --- |
| **Gender** |  |  | 0.064 |  |  | 0.702 |  |  | 0.963 |  |  | 0.502 |
| Male | -1.015 (-1.552, -0.478) | <0.001 |  | -0.664 (-1.129, -0.198) | 0.005 |  | -2.151 (-3.301, -1.002) | <0.001 |  | -0.401 (-0.575, -0.227) | <0.001 |  |
| Female | -0.325 (-0.831, 0.181) | 0.208 |  | -0.787 (-1.226, -0.349) | <0.001 |  | -2.188 (-3.271, -1.105) | <0.001 |  | -0.320 (-0.484, -0.156) | <0.001 |  |
| **Education level** |  |  | 0.516 |  |  | 0.781 |  |  | 0.152 |  |  | 0.310 |
| Less than high school | -0.500 (-1.506, 0.505) | 0.330 |  | -0.516 (-1.386, 0.354) | 0.245 |  | -0.433 (-2.582, 1.716) | 0.693 |  | -0.196 (-0.521, 0.129) | 0.238 |  |
| High school grad or equivalent | -1.012 (-1.737, -0.287) | 0.006 |  | -0.886 (-1.513, -0.259) | 0.006 |  | -3.021 (-4.569, -1.472) | <0.001 |  | -0.491 (-0.726, -0.257) | <0.001 |  |
| Above high school | -0.534 (-0.998, -0.070) | 0.024 |  | -0.710 (-1.112, -0.308) | <0.001 |  | -2.182 (-3.175, -1.190) | <0.001 |  | -0.338 (-0.488, -0.188) | <0.001 |  |
| **PIR** |  |  | 0.846 |  |  | 0.897 |  |  | 0.862 |  |  | 0.784 |
| **<1** | -0.538 (-2.127, 1.050) | 0.507 |  | -0.682 (-2.057, 0.693) | 0.331 |  | -2.403 (-5.815, 1.008) | 0.168 |  | -0.346 (-0.861, 0.169) | 0.188 |  |
| **1-4** | -0.650 (-1.048, -0.252) | 0.001 |  | -0.721 (-1.065, -0.377) | <0.001 |  | -2.194 (-3.049, -1.340) | <0.001 |  | -0.358 (-0.487, -0.229) | <0.001 |  |
| **>4** | -0.981 (-2.121, 0.159) | 0.092 |  | -0.960 (-1.946, 0.026) | 0.057 |  | -2.898 (-5.345, -0.450) | 0.020 |  | -0.493 (-0.863, -0.124) | 0.009 |  |
| **Hypertension** |  |  | 0.021 |  |  | 0.884 |  |  | 0.471 |  |  | 0.150 |
| Yes | -0.399 (-0.827, 0.029) | 0.068 |  | -0.715 (-1.086, -0.345) | <0.001 |  | -2.003 (-2.919, -1.088) | <0.001 |  | -0.308 (-0.446, -0.169) | <0.001 |  |
| No | -1.350 (-2.054, -0.646) | <0.001 |  | -0.768 (-1.377, -0.158) | 0.014 |  | -2.640 (-4.145, -1.134) | <0.001 |  | -0.500 (-0.727, -0.272) | <0.001 |  |
| **Stroke** |  |  | 0.511 |  |  | 0.045 |  |  | 0.599 |  |  | 0.136 |
| Yes | -1.149 (-2.690, 0.393) | 0.144 |  | -2.047 (-3.379, -0.714) | 0.003 |  | -3.025 (-6.319, 0.270) | 0.072 |  | -0.725 (-1.223, -0.227) | 0.004 |  |
| No | -0.621 (-1.001, -0.240) | 0.001 |  | -0.654 (-0.983, -0.325) | <0.001 |  | -2.122 (-2.936, -1.308) | <0.001 |  | -0.337 (-0.460, -0.214) | <0.001 |  |
| **Diabetes** |  |  | 0.702 |  |  | 0.700 |  |  | 0.750 |  |  | 0.804 |
| Yes | -0.562 (-1.142, 0.017) | 0.057 |  | -0.654 (-1.155, -0.152) | 0.011 |  | -2.325 (-3.564, -1.086) | <0.001 |  | -0.340 (-0.527, -0.153) | <0.001 |  |
| No | -0.708 (-1.185, -0.230) | 0.004 |  | -0.780 (-1.193, -0.367) | <0.001 |  | -2.067 (-3.087, -1.046) | <0.001 |  | -0.370 (-0.525, -0.216) | <0.001 |  |

**Abbreviations:** PIR, the ratio of income to poverty; CERAD, The Consortium to Establish a Registry for Alzheimer’s Disease; DSST, Digit Symbol Substitution Test; AFT, Animal Fluency test; The CERAD test score included CERAD-WL and CERAD-DR.

**Supplementary Table3** Comparison of the predictive power of several models.

| **Model** | **Bias** | **MAE** | **MAPE** | **RMSE** | **RRSE** | **RSE** |
| --- | --- | --- | --- | --- | --- | --- |
| **Random Forest** | -0.002 | 1.444 | 280.890 | 1.848 | 0.777 | 0.603 |
| **Gradient Boosting** | -0.086 | 1.456 | 417.930 | 1.856 | 0.780 | 0.609 |
| **ElasticNet** | 0.013 | 1.485 | 405.197 | 1.878 | 0.789 | 0.623 |
| **XGBoost** | 0.019 | 1.515 | 456.378 | 1.942 | 0.816 | 0.666 |
| **CatBoost** | -0.003 | 1.574 | 544.793 | 1.984 | 0.834 | 0.695 |
| **LightGBM** | -0.026 | 1.604 | 557.624 | 2.051 | 0.862 | 0.743 |
| **Weighted Average** | -0.011 | 1.640 | 588.298 | 2.089 | 0.878 | 0.771 |
| **Stacking (Corrected)** | -0.035 | 1.680 | 623.721 | 2.144 | 0.901 | 0.812 |

**Abbreviations:** MAE: Mean Absolute Error；MAPE: Mean Absolute Percentage Error；​RMSE: Root Mean Squared Error；​RRSE: Root Relative Squared Error；​RSE, Relative Squared Error
